# Supplementary material for: New insights into human hair: SAXS, SEM, TEM and EDX for Alopecia Areata investigations
Source: PeerJ. 2020 Jan 14;8:e8376. doi: 10.7717/peerj.8376 (PMC6968496; doi:10.7717/peerj.8376)
Supplement: Supplemental Information 1 [file peerj-08-8376-s001.xlsx]

## Sheet: EDX - raw
Elemental composition obtained from EDX analysis (Wt %) - raw data
	Carbon (C)
	Healthy Donors (HD)								Alopecia Patients (AP)
	Black hair (B-Control)			Grey hair (G-Control)					Black hair (B-AA)			White hair (W-AA)
S = Sample	S 1	S 2	S 3	S 1	S 2	S 3			S 1	S 2	S 3	S 1	S 2	S 3
HD 1	59.11	58.5	58.85	59.25	59.03	58.42		AP 1	58.52	58.69	58.55	53.17	52.14	52.99
HD 2	58.44	58.85	58.51	60.03	59.42	59.26		AP 2	60.44	60.63	60.86	60.69	60.06	60.27
HD 3	59.23	59.64	59.47	55.63	55.92	56.12		AP 3	62.23	62.14	61.91	55.78	56.22	56.73
HD 4	61.2	61.47	61.9	57.01	58.07	57.58		AP 4	63.17	63.08	63.21	63.89	63.78	63.2
HD 5	58.95	58.54	59.14	61.51	62.2	61.42		AP 5	58.46	58.78	58.26	58.5	58.74	59.01
HD 6	58.47	59.21	58.9	60.44	60.65	59.85		AP 6	59.99	60.08	59.62	59.06	59.17	58.2
HD 7	57.26	58.61	57.14	60.09	60.35	60.1		AP 7	62.21	62.35	62.76	55.74	55.94	56.52
HD 8	59.18	60.73	59.07	58.09	58.27	58.07		AP 8	62.43	62.79	62.59	58.52	58.82	57.17
HD 9	59.5	60.47	59.59	57.9	58.07	58.45		AP 9	62.88	63.31	62.36	57.65	57.1	56.6
HD 10	60.25	60.38	59.06	58.42	58.64	58.31		AP 10	61.86	61.77	62.06	52.67	52.86	53.66
HD 11	58.77	59.09	59.33	58.34	58.12	57.87		AP 11	60.9	60.11	60.49	54.68	55.69	55.88
HD 12	59.24	60.63	59.63	61.12	61.54	60.77		AP 12	58.55	58.88	58.93	59.68	58.98	58.66
HD 13	60.65	60.02	59.09	62.35	62.08	62.43		AP 13	60.54	60.7	59.58	57.61	58.36	57.63
HD 14	58.63	58.71	59.11	59.24	60.04	59.76		AP 14	63.23	63.63	62.56	55.34	55.69	55.22
HD 15	58.74	58.84	59.07	60.54	60.87	61.06		AP 15	63.21	63.34	62.99	52.39	52.14	52.35
HD 16	58.45	58.59	58.1	62.78	62.35	61.74		AP 16	59.35	59.97	60.37	55.98	56.28	55.99
HD 17	60.48	59.03	60.41	63.45	62.97	62.87		AP 17	60.99	61.03	61.31	58.97	58.49	59.3
HD 18	61.59	61.6	60.97	59.68	60.12	59.15		AP 18	63.11	63.24	63.08	57.45	56.78	56.84
HD 19	60.57	59.82	60.04	58.66	59.04	58.82		AP 19	59.43	59.82	59.12	54.65	53.91	54.8
HD 20	62.85	62.32	62.15	61.32	61.67	61.45		AP 20	60.15	60.76	60.78	53.49	52.88	52.53
	Nitrogen (N)
	Healthy Donors (HD)								Alopecia Patients (AP)
	B-Control			G-Control					B-AA			W-AA
	S 1	S 2	S 3	S 1	S 2	S 3			S 1	S 2	S 3	S 1	S 2	S 3
HD 1	13	13.16	13.14	14.14	14.3	14.54		AP 1	15.55	15.3	14.36	13.09	13.85	13.56
HD 2	13.74	13.62	14.19	14.62	14.24	14.38		AP 2	12.16	11.8	12.07	12.85	11.53	12.37
HD 3	12.46	12.42	13.39	14.59	13.85	14.56		AP 3	15.07	14.1	14.72	11.52	11.61	11.55
HD 4	10.43	10.26	10.02	13.77	13.32	13.6		AP 4	14.03	13.05	13.73	9.72	9.67	10.87
HD 5	13.87	13.35	13.52	12.92	12.09	13.15		AP 5	11.82	11.68	12.14	12.37	11.84	11.79
HD 6	15.1	14.49	14.32	13.09	12.63	13.34		AP 6	10.58	10.88	11.32	12.66	13.43	12.72
HD 7	14.11	13.34	13.67	12.73	12.51	13.26		AP 7	13.67	13.69	14.75	10.78	9.83	10.16
HD 8	14.96	13.82	14.25	13.93	13.94	13.83		AP 8	11.73	11.43	11.51	13.93	13.58	13.43
HD 9	14.13	13.74	13.31	16.23	15.17	16.03		AP 9	12.89	12.66	12.88	13.06	12.87	13.29
HD 10	12.56	12.81	12.19	15.79	15.45	15.3		AP 10	14.11	13.73	13.9	11.65	12.42	12.01
HD 11	14.65	13.5	13.6	15.64	16.17	15.42		AP 11	13.96	13.9	13.54	12.34	12.28	11.58
HD 12	11.89	11.95	12.09	14.65	13.95	13.67		AP 12	13.58	14.38	13.56	10.89	10.37	11.08
HD 13	12.35	12.89	12.93	13.95	13.99	14.11		AP 13	12.45	12.38	13.09	10.98	9.95	11.07
HD 14	13.67	13.51	13.79	12.58	13.04	12.41		AP 14	11.65	11.59	12.15	10.65	10.14	11.11
HD 15	14.95	14.84	14.58	13.47	13.41	13.25		AP 15	14.69	13.63	13.86	11.23	11.65	10.92
HD 16	15.25	15.16	14.82	12.04	11.43	12.45		AP 16	11.49	11.37	11.14	9.65	10.06	9.85
HD 17	10.65	11.57	10.7	13.28	13.34	13.18		AP 17	12.43	13.08	12.92	10.45	10.68	9.67
HD 18	15.02	15.24	14.88	14.32	14.11	14.45		AP 18	11.78	11.68	12.09	11.34	12.54	11.61
HD 19	14.37	14.3	13.97	13.37	12.4	13.41		AP 19	15.02	15.57	15.2	12.78	13.68	12.15
HD 20	13.74	13.73	13.11	12.45	12.76	12.51		AP 20	14.23	14.16	13.43	10.74	10.21	10.64
	Oxygen (O)
	Healthy Donors (HD)								Alopecia Patients (AP)
	B-Control			G-Control					B-AA			W-AA
	S 1	S 2	S 3	S 1	S 2	S 3			S 1	S 2	S 3	S 1	S 2	S 3
HD 1	16.58	15.68	15.41	14.01	14.06	13.94		AP 1	14.59	14.79	15.04	8.92	8.86	10.01
HD 2	16.19	15.88	16	14.68	14.37	15.38		AP 2	15.72	15.02	15.17	13.85	13.75	13.99
HD 3	14.59	14.68	15.24	16.42	16.98	16.74		AP 3	15.66	15.29	14.79	11.1	10.56	10.58
HD 4	12.29	12.68	12.37	15.82	15.88	15.67		AP 4	14.49	14.9	14.71	9.04	10.07	9.2
HD 5	16.82	16.11	16.01	14.2	14.37	14.25		AP 5	11.49	11.28	11.05	10.44	10.64	10.87
HD 6	16.97	15.87	16.9	13.67	13.37	13.51		AP 6	10.89	10.95	11.06	12.2	12.27	12.96
HD 7	17.15	16.74	17.01	14.35	13.94	14.22		AP 7	15.98	15.14	14.74	9.39	10.16	9.77
HD 8	16.96	15.79	16.2	14.85	14.43	14.5		AP 8	13.29	13.81	13.96	12.92	13.06	13.24
HD 9	13.68	13.12	13.11	15.24	14.99	14.83		AP 9	13.09	12.94	13.05	10.69	10.91	10.17
HD 10	15.67	15.15	15.95	14.9	14.66	14.71		AP 10	13.88	13.71	13.83	10.99	11.08	10.46
HD 11	16.42	16.63	16.03	14.67	14.46	14.45		AP 11	14.07	14.01	14.94	12.59	12.37	11.79
HD 12	14.35	13.87	14.13	13.57	12.92	14.13		AP 12	15.97	14.93	15.68	9.48	10.08	9.45
HD 13	16.47	16.03	16.33	13.68	12.27	12.05		AP 13	14.59	14.08	14.95	10.98	10.68	10.78
HD 14	15.64	15.81	15.38	15.32	14.63	15.48		AP 14	14.38	14.14	13.97	11.25	10.51	11.09
HD 15	15.32	15.82	15.47	14.79	13.91	14.98		AP 15	12.75	12.85	13.05	12.47	12.65	12.95
HD 16	14.75	15.2	14.48	13.85	14.21	13.59		AP 16	10.72	10.79	10.15	11.65	10.6	11.67
HD 17	16.75	16.32	16.38	12.09	12.02	12.15		AP 17	10.45	10.06	10.13	10.45	10.1	9.32
HD 18	14.66	14.49	15.09	14.24	14.57	14.04		AP 18	14.78	15.19	14.71	12.85	12.22	12.78
HD 19	14.82	14.61	14.42	14.78	15.28	14.58		AP 19	12.67	12.31	13.07	10.67	10.31	11.19
HD 20	12.67	13.85	13.11	14.48	14	14.18		AP 20	13.74	12.82	13.21	12.75	13.11	12.83
	Sulphur (S)
	Healthy Donors (HD)								Alopecia Patients (AP)
	B-Control			G-Control					B-AA			W-AA
	S 1	S 2	S 3	S 1	S 2	S 3			S 1	S 2	S 3	S 1	S 2	S 3
HD 1	9.08	10.79	10.62	9.79	9.52	10.79		AP 1	8.79	8.58	9.14	21.29	21.59	20.27
HD 2	10.12	9.67	9.4	8.16	8.39	9.16		AP 2	9.48	9.99	9.74	10.42	12.04	10.69
HD 3	10.81	10.62	9.77	10.72	10.05	10.72		AP 3	5.17	5.77	5.89	18.52	18.35	17.92
HD 4	13.64	13.31	13.83	10.37	10.24	10.37		AP 4	6.63	7.11	6.48	14.24	14.16	14.23
HD 5	8.55	9.28	8.88	8.92	8.82	8.92		AP 5	16.38	16.44	16.83	15.2	15.69	15.29
HD 6	7.54	7.95	7.78	10.35	10.1	10.85		AP 6	15.98	15.8	15.37	12.93	12.58	13.24
HD 7	9.39	9.32	10.25	10.21	10.4	9.81		AP 7	5.87	6.74	5.52	20.96	21.5	20.25
HD 8	7.06	7.57	8.055	10.48	10.03	10.98		AP 8	10.36	10.09	10.04	12.12	11.41	13.62
HD 9	10.6	10.28	10.93	8.73	8.32	8.43		AP 9	9.17	9.21	9.23	15.64	16.39	16.65
HD 10	9.48	9.36	10.49	8.3	9.11	9.3		AP 10	8.1	8.33	8.32	21.29	21.06	20.94
HD 11	8.43	8.76	8.31	8.98	8.79	9.79		AP 11	8.94	9.36	9.06	17.42	17.01	17.78
HD 12	11.91	11.32	11.74	8.48	8.87	9.16		AP 12	9.27	8.86	9.25	17.52	17.76	18.08
HD 13	8.46	8.8	9.04	8.11	8.9	8.72		AP 13	10.08	10.15	10.05	18.24	18.48	17.93
HD 14	9.75	9.622	9.87	10.45	9.64	10.37		AP 14	8.17	8.19	8.82	20.2	21.07	20.01
HD 15	9.21	8.68	8.42	8.92	9.29	8.42		AP 15	6.63	7.43	7.39	20.93	21.06	21.21
HD 16	9.36	9.11	9.65	8.53	9.2	9.55		AP 16	15.38	15.48	15.57	20.46	20.19	19.77
HD 17	10.32	10.5	10.2	8.89	8.63	9.81		AP 17	13.98	13.16	13.19	17.12	17.85	18.79
HD 18	6.6	6.45	6.32	9.48	9.22	9.98		AP 18	7.87	7.32	7.56	15.64	16.05	15.97
HD 19	7.65	8.73	9.19	10.53	10.32	10.73		AP 19	9.86	10.12	10.13	18.89	18.97	18.79
HD 20	8.14	8.07	8.97	9.35	9.98	9.3		AP 20	9.17	9.61	9.71	19.57	20.12	20.45
	Iron (Fe)
	Healthy Donors (HD)								Alopecia Patients (AP)
	B-Control			G-Control					B-AA			W-AA
	S 1	S 2	S 3	S 1	S 2	S 3			S 1	S 2	S 3	S 1	S 2	S 3
HD 1	0.15	0.13	0.16	0.08	0.09	0.1		AP 1	0.23	0.2	0.24	0.32	0.31	0.25
HD 2	0.14	0.11	0.13	0.05	0.04	0.06		AP 2	0.11	0.13	0.1	0.05	0.08	0.04
HD 3	0.23	0.19	0.17	0.12	0.16	0.1		AP 3	0.13	0.1	0.14	0.19	0.15	0.18
HD 4	0.13	0.15	0.11	0.18	0.15	0.14		AP 4	0.1	0.13	0.11	0.2	0.26	0.22
HD 5	0.02	0.06	0.04	0.15	0.16	0.21		AP 5	0.12	0.14	0.15	0.22	0.21	0.22
HD 6	0.07	0.09	0.05	0.06	0.08	0.09		AP 6	0.04	0.02	0.07	0.15	0.12	0.18
HD 7	0.08	0.04	0.06	0.07	0.05	0.08		AP 7	0.08	0.1	0.11	0.14	0.12	0.12
HD 8	0.02	0.06	0.07	0.13	0.09	0.12		AP 8	0.02	0.06	0.07	0.11	0.14	0.16
HD 9	0.19	0.22	0.2	0.08	0.12	0.1		AP 9	0.09	0.11	0.12	0.17	0.14	0.18
HD 10	0.1	0.13	0.11	0.16	0.14	0.19		AP 10	0.08	0.1	0.1	0.29	0.25	0.21
HD 11	0.17	0.13	0.15	0.16	0.12	0.15		AP 11	0.09	0.11	0.12	0.31	0.26	0.28
HD 12	0.13	0.15	0.12	0.15	0.14	0.1		AP 12	0.22	0.21	0.2	0.13	0.15	0.15
HD 13	0.24	0.25	0.19	0.09	0.05	0.06		AP 13	0.13	0.1	0.12	0.18	0.14	0.16
HD 14	0.12	0.11	0.1	0.12	0.17	0.14		AP 14	0.11	0.11	0.11	0.17	0.2	0.23
HD 15	0.14	0.14	0.12	0.1	0.09	0.12		AP 15	0.22	0.18	0.23	0.27	0.3	0.28
HD 16	0.06	0.1	0.11	0.09	0.1	0.11		AP 16	0.15	0.11	0.14	0.13	0.15	0.18
HD 17	0.12	0.12	0.13	0.07	0.04	0.09		AP 17	0.21	0.19	0.18	0.15	0.13	0.17
HD 18	0.09	0.08	0.1	0.08	0.1	0.12		AP 18	0.11	0.14	0.1	0.21	0.17	0.19
HD 19	0.2	0.18	0.19	0.04	0.09	0.06		AP 19	0.1	0.08	0.11	0.25	0.29	0.28
HD 20	0.19	0.17	0.21	0.1	0.16	0.13		AP 20	0.14	0.12	0.15	0.31	0.3	0.28
	Copper (Cu)
	Healthy Donors (HD)								Alopecia Patients (AP)
	B-Control			G-Control					B-AA			W-AA
	S 1	S 2	S 3	S 1	S 2	S 3			S 1	S 2	S 3	S 1	S 2	S 3
HD 1	0.05	0.07	0.1	0.47	0.43	0.44		AP 1	0.53	0.56	0.58	1.01	0.95	0.91
HD 2	0.16	0.25	0.27	0.41	0.35	0.46		AP 2	0.47	0.45	0.46	0.45	0.53	0.49
HD 3	0.57	0.45	0.57	0.44	0.48	0.43		AP 3	0.37	0.39	0.4	0.8	0.78	0.79
HD 4	0.41	0.46	0.4	0.55	0.54	0.49		AP 4	0.26	0.3	0.27	0.59	0.63	0.66
HD 5	0.36	0.4	0.39	0.4	0.47	0.43		AP 5	0.25	0.29	0.22	0.87	0.83	0.9
HD 6	0.34	0.29	0.28	0.49	0.5	0.53		AP 6	0.78	0.83	0.72	0.65	0.61	0.59
HD 7	0.39	0.41	0.45	0.51	0.46	0.45		AP 7	0.34	0.4	0.36	0.8	0.75	0.78
HD 8	0.41	0.47	0.5	0.53	0.45	0.51		AP 8	0.42	0.35	0.49	0.6	0.66	0.629
HD 9	0.55	0.57	0.6	0.47	0.52	0.52		AP 9	0.46	0.43	0.49	0.62	0.65	0.69
HD 10	0.4	0.39	0.37	0.39	0.37	0.45		AP 10	0.3	0.42	0.32	0.64	0.66	0.58
HD 11	0.35	0.35	0.4	0.37	0.4	0.41		AP 11	0.56	0.52	0.47	0.44	0.55	0.57
HD 12	0.58	0.56	0.57	0.48	0.47	0.4		AP 12	0.58	0.61	0.56	0.51	0.54	0.56
HD 13	0.41	0.48	0.45	0.49	0.52	0.54		AP 13	0.4	0.46	0.45	0.49	0.5	0.85
HD 14	0.41	0.39	0.42	0.51	0.55	0.47		AP 14	0.35	0.39	0.34	0.4	0.45	0.35
HD 15	0.42	0.47	0.55	0.6	0.59	0.57		AP 15	0.43	0.4	0.44	0.41	0.35	0.42
HD 16	0.45	0.5	0.55	0.45	0.45	0.47		AP 16	0.52	0.49	0.5	0.61	0.76	0.68
HD 17	0.39	0.4	0.43	0.58	0.62	0.52		AP 17	0.43	0.45	0.48	0.71	0.8	0.76
HD 18	0.44	0.42	0.42	0.56	0.58	0.54		AP 18	0.71	0.77	0.69	0.62	0.76	0.65
HD 19	0.48	0.52	0.5	0.69	0.62	0.57		AP 19	0.66	0.56	0.55	0.99	0.87	0.92
HD 20	0.59	0.57	0.54	0.59	0.68	0.61		AP 20	0.69	0.6	0.65	0.85	0.89	0.95
	Zinc (Zn)
	Healthy Donors (HD)								Alopecia Patients (AP)
	B-Control			G-Control					B-AA			W-AA
	S 1	S 2	S 3	S 1	S 2	S 3			S 1	S 2	S 3	S 1	S 2	S 3
HD 1	0.24	0.29	0.21	0.32	0.27	0.31		AP 1	0.36	0.24	0.28	0.6	0.56	0.64
HD 2	0.16	0.2	0.21	0.26	0.24	0.29		AP 2	0.28	0.26	0.3	0.27	0.25	0.3
HD 3	0.39	0.34	0.33	0.27	0.3	0.24		AP 3	0.21	0.22	0.25	0.39	0.35	0.29
HD 4	0.27	0.3	0.29	0.36	0.38	0.32		AP 4	0.16	0.22	0.26	0.32	0.41	0.49
HD 5	0.26	0.27	0.2	0.26	0.23	0.3		AP 5	0.3	0.28	0.27	0.47	0.42	0.4
HD 6	0.21	0.19	0.23	0.28	0.31	0.25		AP 6	0.33	0.31	0.36	0.54	0.46	0.56
HD 7	0.31	0.32	0.26	0.34	0.42	0.36		AP 7	0.25	0.22	0.24	0.4	0.47	0.42
HD 8	0.25	0.23	0.28	0.23	0.34	0.32		AP 8	0.33	0.3	0.29	0.42	0.46	0.52
HD 9	0.3	0.24	0.27	0.25	0.28	0.32		AP 9	0.27	0.29	0.32	0.4	0.49	0.45
HD 10	0.27	0.31	0.24	0.23	0.21	0.25		AP 10	0.16	0.23	0.17	0.66	0.63	0.55
HD 11	0.29	0.26	0.22	0.3	0.31	0.43		AP 11	0.15	0.21	0.13	0.24	0.34	0.36
HD 12	0.22	0.25	0.27	0.21	0.27	0.28		AP 12	0.28	0.32	0.26	0.46	0.49	0.45
HD 13	0.18	0.16	0.14	0.2	0.25	0.23		AP 13	0.21	0.26	0.27	0.49	0.44	0.51
HD 14	0.21	0.24	0.27	0.36	0.4	0.32		AP 14	0.16	0.23	0.22	0.4	0.42	0.38
HD 15	0.23	0.18	0.22	0.26	0.3	0.36		AP 15	0.36	0.34	0.4	0.48	0.52	0.55
HD 16	0.31	0.27	0.32	0.3	0.32	0.33		AP 16	0.55	0.47	0.51	0.33	0.35	0.42
HD 17	0.16	0.22	0.18	0.34	0.36	0.36		AP 17	0.28	0.32	0.27	0.37	0.35	0.4
HD 18	0.29	0.31	0.26	0.26	0.22	0.23		AP 18	0.23	0.26	0.29	0.46	0.42	0.48
HD 19	0.23	0.27	0.21	0.21	0.3	0.24		AP 19	0.35	0.28	0.33	0.45	0.59	0.42
HD 20	0.2	0.23	0.24	0.28	0.34	0.31		AP 20	0.26	0.33	0.3	0.57	0.62	0.63

## Sheet: EDX - Mean + SD
Elemental composition obtained from EDX analysis (Wt %) - raw data
	Carbon (C)
	Healthy Donors (HD)						Alopecia Patients (AP)
	Black hair (B-Control)		Grey hair (G-Control)				Black hair (B-AA)		White hair (W-AA)
S = Sample	Mean	SD	Mean	SD			Mean	SD	Mean	SD
HD 1	58.82	0.306105	58.9	0.43		AP 1	58.5867	0.0907377	52.7667	0.550121
HD 2	58.6	0.219317	59.57	0.406325		AP 2	60.6433	0.210317	60.34	0.32078
HD 3	59.4467	0.205994	55.89	0.246374		AP 3	62.0933	0.165025	56.2433	0.47543
HD 4	61.5233	0.353034	57.5533	0.530503		AP 4	63.1533	0.0665833	63.6233	0.37072
HD 5	58.8767	0.306649	61.71	0.426732		AP 5	58.5	0.262298	58.75	0.255147
HD 6	58.86	0.371618	60.3133	0.414769		AP 6	59.8967	0.24379	58.81	0.531131
HD 7	57.67	0.816272	60.18	0.147309		AP 7	62.44	0.285832	56.0667	0.405134
HD 8	59.66	0.928278	58.1433	0.110151		AP 8	62.6033	0.18037	58.17	0.87892
HD 9	59.8533	0.535942	58.14	0.281603		AP 9	62.85	0.47571	57.1167	0.525198
HD 10	59.8967	0.727484	58.4567	0.168028		AP 10	61.8967	0.148436	53.0633	0.525389
HD 11	59.0633	0.280951	58.11	0.23516		AP 11	60.5	0.395095	55.4167	0.645006
HD 12	59.8333	0.716961	61.1433	0.38553		AP 12	58.7867	0.206478	59.1067	0.521664
HD 13	59.92	0.784793	62.2867	0.183394		AP 13	60.2733	0.60575	57.8667	0.427356
HD 14	58.8167	0.257164	59.68	0.405956		AP 14	63.14	0.540648	55.4167	0.244199
HD 15	58.8833	0.169214	60.8233	0.263122		AP 15	63.18	0.176918	52.2933	0.134288
HD 16	58.38	0.252389	62.29	0.52259		AP 16	59.8967	0.513939	56.0833	0.170392
HD 17	59.9733	0.8177	63.0967	0.310054		AP 17	61.11	0.174356	58.92	0.407308
HD 18	61.3867	0.360879	59.65	0.485695		AP 18	63.1433	0.085049	57.0233	0.37072
HD 19	60.1433	0.38553	58.84	0.190788		AP 19	59.4567	0.350761	54.4533	0.47648
HD 20	62.44	0.365103	61.48	0.176918		AP 20	60.5633	0.358097	52.9667	0.485833
	Nitrogen (N)
	Healthy Donors (HD)						Alopecia Patients (AP)
	B-Control		G-Control				B-AA		W-AA
	Mean	SD	Mean	SD			Mean	SD	Mean	SD
HD 1	13.1	0.087178	14.3267	0.201329		AP 1	15.07	0.627455	13.5	0.383536
HD 2	13.85	0.3005	14.4133	0.19218		AP 2	12.01	0.18735	12.25	0.668132
HD 3	12.7567	0.548847	14.3333	0.418848		AP 3	14.63	0.491223	11.56	0.0458258
HD 4	10.2367	0.205994	13.5633	0.22723		AP 4	13.6033	0.502129	10.0867	0.678847
HD 5	13.58	0.265141	12.72	0.557584		AP 5	11.88	0.235797	12	0.321403
HD 6	14.6367	0.410163	13.02	0.360139		AP 6	10.9267	0.372201	12.9367	0.428291
HD 7	13.7067	0.386307	12.8333	0.38553		AP 7	14.0367	0.617846	10.2567	0.482321
HD 8	14.3433	0.575702	13.9	0.0608276		AP 8	11.5567	0.155349	13.6467	0.25658
HD 9	13.7267	0.410163	15.81	0.563205		AP 9	12.81	0.13	13.0733	0.210317
HD 10	12.52	0.311929	15.5133	0.251064		AP 10	13.9133	0.190351	12.0267	0.38527
HD 11	13.9167	0.63705	15.7433	0.38553		AP 11	13.8	0.227156	12.0667	0.422532
HD 12	11.9767	0.102632	14.09	0.504777		AP 12	13.84	0.467761	10.78	0.36756
HD 13	12.7233	0.323934	14.0167	0.0832666		AP 13	12.64	0.39128	10.6667	0.622281
HD 14	13.6567	0.140475	12.6767	0.325935		AP 14	11.7967	0.307463	10.6333	0.485215
HD 15	14.79	0.19	13.3767	0.113725		AP 15	14.06	0.557584	11.2667	0.366379
HD 16	15.0767	0.226789	11.9733	0.513258		AP 16	11.3333	0.177858	9.85333	0.20502
HD 17	10.9733	0.517333	13.2667	0.080829		AP 17	12.81	0.338674	10.2667	0.529371
HD 18	15.0467	0.181475	14.2933	0.171561		AP 18	11.85	0.213776	11.83	0.629524
HD 19	14.2133	0.21362	13.06	0.571927		AP 19	15.2633	0.280416	12.87	0.76896
HD 20	13.5267	0.360879	12.5733	0.164418		AP 20	13.94	0.443058	10.53	0.281603
	Oxygen (O)
	Healthy Donors (HD)						Alopecia Patients (AP)
	B-Control		G-Control				B-AA		W-AA
	Mean	SD	Mean	SD			Mean	SD	Mean	SD
HD 1	15.89	0.612617	14.0033	0.0602771		AP 1	14.8067	0.225462	9.26333	0.647328
HD 2	16.0233	0.156312	14.81	0.517397		AP 2	15.3033	0.368556	13.8633	0.120554
HD 3	14.8367	0.352184	16.7133	0.280951		AP 3	15.2467	0.436616	10.7467	0.306159
HD 4	12.4467	0.205994	15.79	0.108167		AP 4	14.7	0.205183	9.43667	0.554286
HD 5	16.3133	0.441626	14.2733	0.0873689		AP 5	11.2733	0.220076	10.65	0.215174
HD 6	16.58	0.615873	13.5167	0.150111		AP 6	10.9667	0.0862168	12.4767	0.42004
HD 7	16.9667	0.208407	14.17	0.209523		AP 7	15.2867	0.632877	9.77333	0.385011
HD 8	16.3167	0.593661	14.5933	0.225019		AP 8	13.6867	0.351615	13.0733	0.160416
HD 9	13.3033	0.326241	15.02	0.20664		AP 9	13.0267	0.0776745	10.59	0.38
HD 10	15.59	0.405956	14.7567	0.126623		AP 10	13.8067	0.0873689	10.8433	0.335012
HD 11	16.36	0.304467	14.5267	0.124231		AP 11	14.34	0.520481	12.25	0.41328
HD 12	14.1167	0.240278	13.54	0.605558		AP 12	15.5267	0.536687	9.67	0.355387
HD 13	16.2767	0.224796	12.6667	0.88444		AP 13	14.54	0.43715	10.8133	0.152753
HD 14	15.61	0.216564	15.1433	0.4517		AP 14	14.1633	0.205994	10.95	0.389358
HD 15	15.5367	0.25658	14.56	0.570877		AP 15	12.8833	0.152753	12.69	0.242487
HD 16	14.81	0.363731	13.8833	0.311341		AP 16	10.5533	0.351046	11.3067	0.612073
HD 17	16.4833	0.232881	12.0867	0.0650641		AP 17	10.2133	0.207926	9.95667	0.578475
HD 18	14.7467	0.309246	14.2833	0.267644		AP 18	14.8933	0.259294	12.6167	0.345302
HD 19	14.6167	0.200083	14.88	0.360555		AP 19	12.6833	0.380175	10.7233	0.442418
HD 20	13.21	0.596322	14.22	0.242487		AP 20	13.2567	0.461772	12.8967	0.189033
	Sulphur (S)
	Healthy Donors (HD)						Alopecia Patients (AP)
	B-Control		G-Control				B-AA		W-AA
	Mean	SD	Mean	SD			Mean	SD	Mean	SD
HD 1	10.1633	0.942037	10.0333	0.669054		AP 1	8.83667	0.282902	21.05	0.691954
HD 2	9.73	0.363731	8.57	0.523737		AP 2	9.73667	0.255016	11.05	0.867929
HD 3	10.4	0.553805	10.4967	0.386825		AP 3	5.61	0.385746	18.2633	0.309246
HD 4	13.5933	0.263122	10.3267	0.0750555		AP 4	6.74	0.32909	14.21	0.043589
HD 5	8.90333	0.365559	8.88667	0.057735		AP 5	16.55	0.244336	15.3933	0.260832
HD 6	7.75667	0.205994	10.4333	0.381881		AP 6	15.7167	0.313422	12.9167	0.330202
HD 7	9.65333	0.517912	10.14	0.301164		AP 7	6.04333	0.628198	20.9033	0.626924
HD 8	7.56333	0.500033	10.4967	0.475219		AP 8	10.1633	0.172143	12.3833	1.12829
HD 9	10.6033	0.325013	8.49333	0.212211		AP 9	9.20333	0.0305505	16.2267	0.524436
HD 10	9.77667	0.620672	8.90333	0.531068		AP 10	8.25	0.13	21.0967	0.177858
HD 11	8.5	0.233024	9.18667	0.531068		AP 11	9.12	0.216333	17.4033	0.38527
HD 12	11.6567	0.303699	8.83667	0.341223		AP 12	9.12667	0.231157	17.7867	0.280951
HD 13	8.76667	0.291433	8.57667	0.414045		AP 13	10.0933	0.051316	18.2167	0.275741
HD 14	9.74667	0.125033	10.1533	0.446356		AP 14	8.39333	0.369639	20.4267	0.565184
HD 15	8.77	0.402616	8.87667	0.436616		AP 15	7.15	0.450777	21.0667	0.140119
HD 16	9.37333	0.270247	9.09333	0.518298		AP 16	15.4767	0.0950438	20.14	0.347707
HD 17	10.34	0.150997	9.11	0.62		AP 17	13.4433	0.465009	17.92	0.837198
HD 18	6.45667	0.140119	9.56	0.386264		AP 18	7.58333	0.275741	15.8867	0.217332
HD 19	8.52333	0.790527	10.5267	0.20502		AP 19	10.0367	0.15308	18.8833	0.090185
HD 20	8.39333	0.500633	9.54333	0.37899		AP 20	9.49667	0.287286	20.0467	0.44456
	Iron (Fe)
	Healthy Donors (HD)						Alopecia Patients (AP)
	B-Control		G-Control				B-AA		W-AA
	Mean	SD	Mean	SD			Mean	SD	Mean	SD
HD 1	0.146667	0.0152753	0.09	0.01		AP 1	0.223333	0.0208167	0.293333	0.0378594
HD 2	0.126667	0.0152753	0.05	0.01		AP 2	0.113333	0.0152753	0.0566667	0.0208167
HD 3	0.196667	0.0305505	0.126667	0.0305505		AP 3	0.123333	0.0208167	0.173333	0.0208167
HD 4	0.13	0.02	0.156667	0.0208167		AP 4	0.113333	0.0152753	0.226667	0.0305505
HD 5	0.04	0.02	0.173333	0.0321455		AP 5	0.136667	0.0152753	0.216667	0.0057735
HD 6	0.07	0.02	0.0766667	0.0152753		AP 6	0.0433333	0.0251661	0.15	0.03
HD 7	0.06	0.02	0.0666667	0.0152753		AP 7	0.0966667	0.0152753	0.126667	0.011547
HD 8	0.05	0.0264575	0.113333	0.0208167		AP 8	0.05	0.0264575	0.136667	0.0251661
HD 9	0.203333	0.0152753	0.1	0.02		AP 9	0.106667	0.0152753	0.163333	0.0208167
HD 10	0.113333	0.0152753	0.163333	0.0251661		AP 10	0.0933333	0.011547	0.25	0.04
HD 11	0.15	0.02	0.143333	0.0208167		AP 11	0.106667	0.0152753	0.283333	0.0251661
HD 12	0.133333	0.0152753	0.13	0.0264575		AP 12	0.21	0.01	0.143333	0.011547
HD 13	0.226667	0.0321455	0.0666667	0.0208167		AP 13	0.116667	0.0152753	0.16	0.02
HD 14	0.11	0.01	0.143333	0.0251661		AP 14	0.11	0	0.2	0.03
HD 15	0.133333	0.011547	0.103333	0.0152753		AP 15	0.21	0.0264575	0.283333	0.0152753
HD 16	0.09	0.0264575	0.1	0.01		AP 16	0.133333	0.0208167	0.153333	0.0251661
HD 17	0.123333	0.0057735	0.0666667	0.0251661		AP 17	0.193333	0.0152753	0.15	0.02
HD 18	0.09	0.01	0.1	0.02		AP 18	0.116667	0.0208167	0.19	0.02
HD 19	0.19	0.01	0.0633333	0.0251661		AP 19	0.0966667	0.0152753	0.273333	0.0208167
HD 20	0.19	0.02	0.13	0.03		AP 20	0.136667	0.0152753	0.296667	0.0152753
	Copper (Cu)
	Healthy Donors (HD)						Alopecia Patients (AP)
	B-Control		G-Control				B-AA		W-AA
	Mean	SD	Mean	SD			Mean	SD	Mean	SD
HD 1	0.0733333	0.0251661	0.446667	0.0208167		AP 1	0.556667	0.0251661	0.956667	0.0503322
HD 2	0.226667	0.0585947	0.406667	0.0550757		AP 2	0.46	0.01	0.49	0.04
HD 3	0.53	0.069282	0.45	0.0264575		AP 3	0.386667	0.0152753	0.79	0.01
HD 4	0.423333	0.0321455	0.526667	0.0321455		AP 4	0.276667	0.0208167	0.626667	0.0351188
HD 5	0.383333	0.0208167	0.433333	0.0351188		AP 5	0.253333	0.0351188	0.866667	0.0351188
HD 6	0.303333	0.0321455	0.506667	0.0208167		AP 6	0.776667	0.0550757	0.616667	0.0305505
HD 7	0.416667	0.0305505	0.473333	0.0321455		AP 7	0.366667	0.0305505	0.776667	0.0251661
HD 8	0.46	0.0458258	0.496667	0.0416333		AP 8	0.42	0.07	0.63	0.03
HD 9	0.573333	0.0251661	0.503333	0.0288675		AP 9	0.46	0.03	0.653333	0.0351188
HD 10	0.386667	0.0152753	0.403333	0.0416333		AP 10	0.346667	0.064291	0.626667	0.0416333
HD 11	0.366667	0.0288675	0.393333	0.0208167		AP 11	0.516667	0.0450925	0.52	0.07
HD 12	0.57	0.01	0.45	0.043589		AP 12	0.583333	0.0251661	0.536667	0.0251661
HD 13	0.446667	0.0351188	0.516667	0.0251661		AP 13	0.436667	0.0321455	0.613333	0.20502
HD 14	0.406667	0.0152753	0.51	0.04		AP 14	0.36	0.0264575	0.4	0.05
HD 15	0.48	0.0655744	0.586667	0.0152753		AP 15	0.423333	0.0208167	0.393333	0.0378594
HD 16	0.5	0.05	0.456667	0.011547		AP 16	0.503333	0.0152753	0.683333	0.0750555
HD 17	0.406667	0.0208167	0.573333	0.0503322		AP 17	0.453333	0.0251661	0.756667	0.0450925
HD 18	0.426667	0.011547	0.56	0.02		AP 18	0.723333	0.0416333	0.676667	0.0737111
HD 19	0.5	0.02	0.626667	0.0602771		AP 19	0.59	0.0608276	0.926667	0.0602771
HD 20	0.566667	0.0251661	0.626667	0.0472582		AP 20	0.646667	0.0450925	0.896667	0.0503322
	Zinc (Zn)
	Healthy Donors (HD)						Alopecia Patients (AP)
	B-Control		G-Control				B-AA		W-AA
	Mean	SD	Mean	SD			Mean	SD	Mean	SD
HD 1	0.246667	0.0404145	0.3	0.0264575		AP 1	0.293333	0.061101	0.6	0.04
HD 2	0.19	0.0264575	0.263333	0.0251661		AP 2	0.28	0.02	0.273333	0.0251661
HD 3	0.353333	0.0321455	0.27	0.03		AP 3	0.226667	0.0208167	0.343333	0.0503322
HD 4	0.286667	0.0152753	0.353333	0.0305505		AP 4	0.213333	0.0503322	0.406667	0.085049
HD 5	0.243333	0.0378594	0.263333	0.0351188		AP 5	0.283333	0.0152753	0.43	0.0360555
HD 6	0.21	0.02	0.28	0.03		AP 6	0.333333	0.0251661	0.52	0.052915
HD 7	0.296667	0.0321455	0.373333	0.0416333		AP 7	0.236667	0.0152753	0.43	0.0360555
HD 8	0.253333	0.0251661	0.296667	0.0585947		AP 8	0.306667	0.0208167	0.466667	0.0503322
HD 9	0.27	0.03	0.283333	0.0351188		AP 9	0.293333	0.0251661	0.446667	0.0450925
HD 10	0.273333	0.0351188	0.23	0.02		AP 10	0.186667	0.0378594	0.613333	0.0568624
HD 11	0.256667	0.0351188	0.346667	0.0723418		AP 11	0.163333	0.0416333	0.313333	0.064291
HD 12	0.246667	0.0251661	0.253333	0.0378594		AP 12	0.286667	0.0305505	0.466667	0.0208167
HD 13	0.16	0.02	0.226667	0.0251661		AP 13	0.246667	0.0321455	0.48	0.0360555
HD 14	0.24	0.03	0.36	0.04		AP 14	0.203333	0.0378594	0.4	0.02
HD 15	0.21	0.0264575	0.306667	0.0503322		AP 15	0.366667	0.0305505	0.516667	0.0351188
HD 16	0.3	0.0264575	0.316667	0.0152753		AP 16	0.51	0.04	0.366667	0.0472582
HD 17	0.186667	0.0305505	0.353333	0.011547		AP 17	0.29	0.0264575	0.373333	0.0251661
HD 18	0.286667	0.0251661	0.236667	0.0208167		AP 18	0.26	0.03	0.453333	0.0305505
HD 19	0.236667	0.0305505	0.25	0.0458258		AP 19	0.32	0.0360555	0.486667	0.0907377
HD 20	0.223333	0.0208167	0.31	0.03		AP 20	0.296667	0.0351188	0.606667	0.0321455
